# Supplementary material for: Diverse mating phenotypes impact the spread of wtf meiotic drivers in S. pombe
Source: bioRxiv preprint, doi:10.1101/2021.05.28.446231, version 1 (2021-05-28)
Supplement: Supplemental File 5 [file 446231_file06.xlsx]

## Sheet: Sheet1
Oligos
oligo	sequence
686	AATATAGGAGCTC TAT AAT AGA TCA CAA AGG AAA ACT CGC CGC AG
688	AATATAGGAGCTC GGAAAGCTAAGTTGGGGTGAATAAAAAGGGC
3178	CTATATACGATCAAAATCGCCTCTC
3179	AGCTGTATGTATTATGAGTGATGC
